# Supplementary material
Source: HighWire-hosted journal article supplement (https://erj.ersjournals.com/content/56/2/2000054)
Supplement: inline-supplementary-material-1 [file inline-supplementary-material-1.pdf]

## SUPPLEMENTARY MATERIAL

### Experimental dyspnea interferes with locomotion and cognition: a randomised trial

Lawi D<sup>1</sup>, Dupuis-Lozeron E<sup>2,7</sup>, Berra G<sup>1</sup>, Allali G<sup>3,4,7</sup>, Similowski T<sup>5,6</sup>, Adler D<sup>1,7</sup>

<sup>1</sup> Division of Pulmonary Diseases, Geneva University Hospitals, Geneva, Switzerland.

<sup>2</sup> Clinical Research Centre & Division of Clinical Epidemiology, Department of Health and Community Medicine, Geneva University Hospitals, Geneva, Switzerland.

<sup>3</sup> Department of Neurology, Geneva University Hospitals, Geneva, Switzerland.

<sup>4</sup> Department of Neurology, Division of Cognitive and Motor Aging, Albert Einstein College of Medicine, Bronx, NY, USA.

<sup>5</sup> AP-HP, Groupe Hospitalier Pitié-Salpêtrière Charles Foix, Intensive Care Unit and Respiratory Division (Département "R3S"), Paris, France.

<sup>6</sup> Sorbonne University, UPMC Paris 06, INSERM, UMRS1158 Neurophysiologie respiratoire expérimentale et clinique, Paris, France.

<sup>7</sup> University of Geneva Faculty of Medicine, Geneva, Switzerland.

**Table S1: Results summary**

|                                  | Calm breathing         |                          | Experimental dyspnea   |                          |
|----------------------------------|------------------------|--------------------------|------------------------|--------------------------|
| TESTS *                          | Loaded breathing first | Unloaded breathing first | Loaded breathing first | Unloaded breathing first |
| LOCOMOTION                       |                        |                          |                        |                          |
| TUG (seconds)                    | 9.35 ± 1.50            | 8.95 ± 1.36              | 10.09 ± 1.53           | 8.99 ± 1.36              |
| iTUG (seconds)                   | 6.69 ± 2.23            | 7.03 ± 2.11              | 6.35 ± 1.55            | 6.05 ± 1.29              |
| EXECUTIVE FUNCTION               |                        |                          |                        |                          |
| Verbal Fluency Test (# word)     |                        |                          |                        |                          |
| Categorical                      | 34.9 ± 8.17            | 35.4 ± 8.34              | 29.80 ± 7.94           | 36.7 ± 8.04              |
| Lexical                          | 26.10 ± 6.58           | 24.05 ± 4.77             | 22.7 ± 7.77            | 26.20 ± 7.47             |
| Trail Making Test (seconds)      |                        |                          |                        |                          |
| A                                | 6.13 ± 3.10            | 18.61 ± 4.03             | 17.98 ± 4.56           | 15.02 ± 4.55             |
| B                                | 33.47 ± 10.81          | 43.04 ± 10.60            | 39.68 ± 12             | 30.90 ± 15.47            |
| PROCESSING SPEED                 |                        |                          |                        |                          |
| CODE (# correct association)     | 88.10 ± 14.81          | 81.3 ± 12.37             | 77 ± 15.42             | 92.05 ± 16.21            |
| WORKING MEMORY                   |                        |                          |                        |                          |
| Memory span (# correct sequence) |                        |                          |                        |                          |
| Direct                           | 10.5 ± 1.7             | 10.3 ± 1.3               | 9.3 ± 1.49             | 10.15 ± 1.63             |
| Indirect                         | 7.2 ± 2.24             | 6.45 ± 1.79              | 6.45 ± 1.88            | 7.3 ± 2.05               |

\*Plus-minus values are means ± standard deviation.

TUG : Test Up and Go, iTUG : imagined Test Up and Go, TMT : Trail Making Test, CODE: CODE test
