# Supplementary material
Source: HighWire-hosted journal article supplement (https://erj.ersjournals.com/content/56/2/2000054)
Supplement: inline-supplementary-material-2 [file inline-supplementary-material-2.pdf]

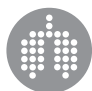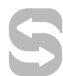

SHAREABLE PDF

# Experimental dyspnoea interferes with locomotion and cognition: a randomised trial

David Lawi<sup>1</sup>, Elise Dupuis-Lozeron<sup>2,3</sup>, Gregory Berra<sup>1</sup>, Gilles Allali<sup>3,4,5</sup>, Thomas Similowski<sup>6,7</sup> and Dan Adler<sup>1,3</sup> 

**Affiliations:** <sup>1</sup>Division of Pulmonary Diseases, Geneva University Hospitals, Geneva, Switzerland. <sup>2</sup>Clinical Research Centre and Division of Clinical Epidemiology, Dept of Health and Community Medicine, Geneva University Hospitals, Geneva, Switzerland. <sup>3</sup>University of Geneva Faculty of Medicine, Geneva, Switzerland. <sup>4</sup>Dept of Neurology, Geneva University Hospitals, Geneva, Switzerland. <sup>5</sup>Dept of Neurology, Division of Cognitive and Motor Aging, Albert Einstein College of Medicine, Bronx, NY, USA. <sup>6</sup>AP-HP, Groupe Hospitalier Pitié-Salpêtrière Charles Foix, Intensive Care Unit and Respiratory Division (Département "R3S"), Paris, France. <sup>7</sup>Sorbonne University, UPMC Paris 06, INSERM, UMRS1158 Neurophysiologie Respiratoire Expérimentale et Clinique, Paris, France.

**Correspondence:** Dan Adler, Division of Pulmonary Diseases, Geneva University Hospitals, 4 Rue Gabrielle-Perret-Gentil, 1211 Geneva 14, Switzerland. E-mail: dan.adler@hcuge.ch

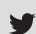

@ERSpublications

Acute experimental dyspnoea can negatively impact on locomotion/cognition through shared neural substrates. There is a need for clinical interventions to improve non-respiratory symptoms of chronic respiratory diseases by focussing on alleviating dyspnoea. <https://bit.ly/2wGHcjW>

**Cite this article as:** Lawi D, Dupuis-Lozeron E, Berra G, *et al.* Experimental dyspnoea interferes with locomotion and cognition: a randomised trial. *Eur Respir J* 2020; 56: 2000054 [<https://doi.org/10.1183/13993003.00054-2020>].

This single-page version can be shared freely online.

## ABSTRACT

**Background:** Chronic respiratory diseases are associated with cognitive dysfunction, but whether dyspnoea by itself negatively impacts on cognition has not been demonstrated. Cortical networks engaged in subjects experiencing dyspnoea are also activated during other tasks that require cognitive input and this may provoke a negative impact through interference with each other.

**Methods:** This randomised, crossover trial investigated whether experimentally-induced dyspnoea would negatively impact on locomotion and cognitive function among 40 healthy adults. Crossover conditions were unloaded breathing or loaded breathing using an inspiratory threshold load. To evaluate locomotion, participants were assessed by the Timed Up and Go (TUG) test. Cognitive function was assessed by categorical and phonemic verbal fluency tests, the Trail Making Tests (TMTs) A and B (executive function), the CODE test from the Wechsler Adult Intelligence Scale (WAIS)-IV (processing speed) and by direct and indirect digit span (working memory).

**Results:** The mean time difference to perform the TUG test between unloaded and loaded breathing was  $-0.752$  s (95% CI  $-1.012$  to  $-0.492$  s) ( $p < 0.001$ ). Executive function, processing speed and working memory performed better during unloaded breathing, particularly for subjects starting first with the loaded breathing condition.

**Conclusion:** Our data suggest that respiratory threshold loading to elicit dyspnoea had a major impact on locomotion and cognitive function in healthy adults.
